# Supplementary material
Source: PubMed Central journal article supplement (PMC8221834)
Supplement: NIHMS1705528-supplement-Supplemental_Material.pdf [file NIHMS1705528-supplement-Supplemental_Material.pdf]

## **Supplemental Material**

### **Cell-free DNA to Detect Heart Allograft**

#### **Acute Rejection**

## **Supplemental Methods**

### ***Patient monitoring schedule and sample collection schedules***

Subjects at all five centers with surveillance endomyocardial biopsy (EMBx), donor specific antibodies and echocardiography. Routine clinical labs such as basic metabolic panel and complete count, as well as labs to monitor tacrolimus and other immunosuppression drugs troughs, cytomegalovirus PCR were also performed. EMBx schedule at each of the 5 centers is shown in Supplemental Tables I a-e. The study collected blood samples coincident to surveillance EMBx. Additional samples were collected in the early transplant period on Days 1 and 7, and also when subjects presented with clinical or echocardiographic signs of allograft dysfunction.

## Supplemental Figure I: Genomic Element Characterization in ACR and AMR

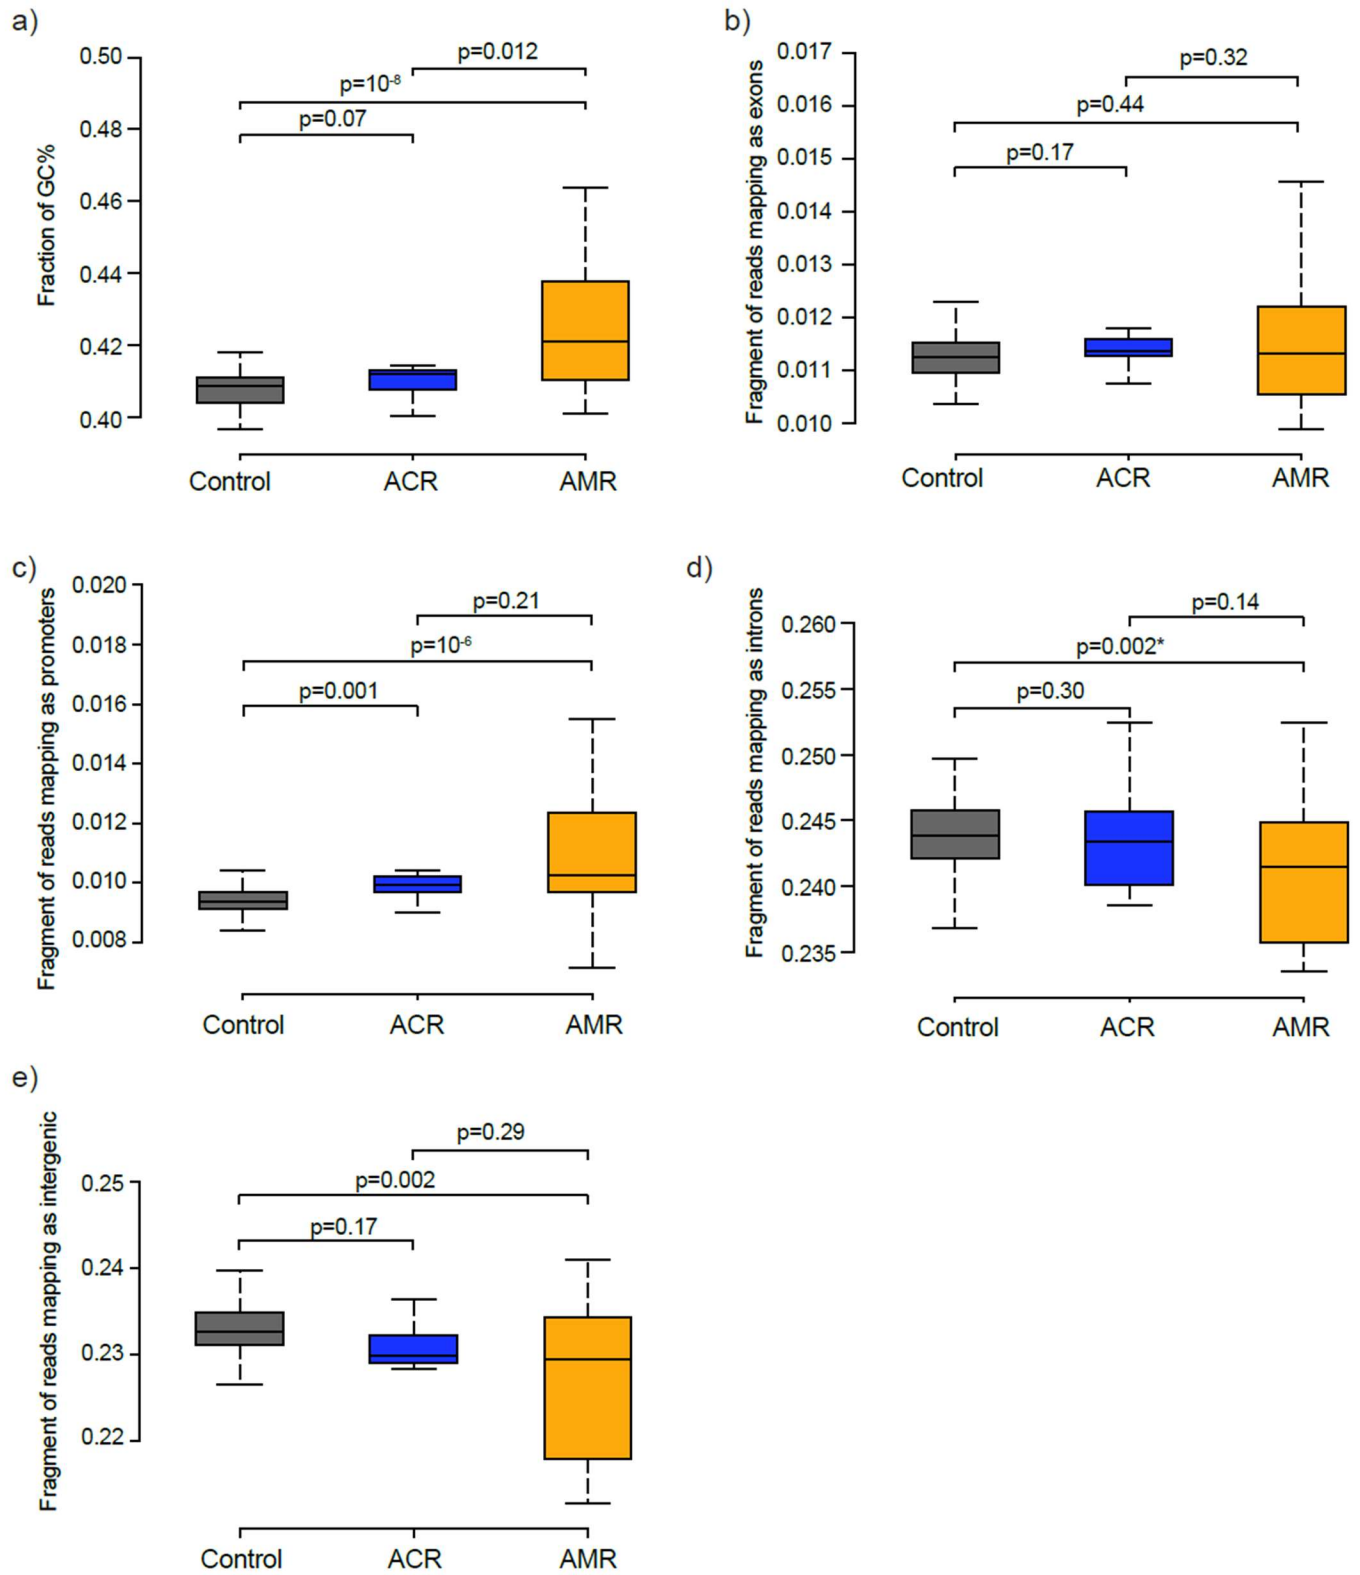

Genomic composition of ddcfDNA measures was compared in ACR, AMR and controls. AMR showed higher fraction of guanosine-cytosine base content (a), but similar fraction of reads mapping as exons (b) compared to ACR or controls. AMR also showed higher fraction of reads mapping as promoters (c) and lower fraction of reads mapping as introns (d) or intergenic regions (e) compared to ACR and no rejection controls, repeat elements are not included in intronic and intergenic regions.

## Supplemental Tables

### Supplemental Table I: Post-Transplant Allograft Surveillance Schedule

| Suppl Table Ia-Center 1 post-heart transplant care-biopsy schedule and proposed blood draws for cell-free DNA assay |                       |   |   |   |   |    |    |                |    |    |                               |   |   |    |    |    |    |    |    |    |          |    |
|---------------------------------------------------------------------------------------------------------------------|-----------------------|---|---|---|---|----|----|----------------|----|----|-------------------------------|---|---|----|----|----|----|----|----|----|----------|----|
|                                                                                                                     | Weeks post-transplant |   |   |   |   |    |    |                |    |    | Months/years' post-transplant |   |   |    |    |    |    |    |    |    |          |    |
|                                                                                                                     | 1                     | 2 | 4 | 6 | 8 | 10 | 12 | 16             | 20 | 24 | 7                             | 8 | 9 | 10 | 11 | 12 | 15 | 18 | 21 | 24 | 2-5 yrs. |    |
| EMB                                                                                                                 | X                     | X | X | X | X | X  | X  | X              | X  | X  |                               | X |   | X  |    | X  |    | X  |    | X  | Xc       |    |
| Clinic visit                                                                                                        | X                     | X | X | X | X | X  | X  | X <sub>1</sub> | X  | X  | X                             | X | X | X  | X  | X  | X  | X  | X  | X  | X        | Xb |
| Blood draw                                                                                                          | X                     | X | X | X | X | X  | X  | X <sub>1</sub> |    | X  |                               | X |   | X  |    | X  |    | X  |    | X  | Xb       |    |

| Suppl Table Ib-Center 2 post-heart transplant care-biopsy schedule and proposed blood draws for cell-free DNA assay |                       |   |   |   |   |   |    |    |    |    |                               |   |   |    |    |    |    |    |    |    |          |    |
|---------------------------------------------------------------------------------------------------------------------|-----------------------|---|---|---|---|---|----|----|----|----|-------------------------------|---|---|----|----|----|----|----|----|----|----------|----|
|                                                                                                                     | Weeks post-transplant |   |   |   |   |   |    |    |    |    | Months/years' post-transplant |   |   |    |    |    |    |    |    |    |          |    |
|                                                                                                                     | 1                     | 2 | 3 | 4 | 6 | 8 | 12 | 16 | 20 | 24 | 7                             | 8 | 9 | 10 | 11 | 12 | 15 | 18 | 21 | 24 | 2-5 yrs. |    |
| EMB                                                                                                                 | X                     | X | X | X | X | X | X  | X  | X  | X  |                               |   |   | X  |    | X  |    |    |    |    | X        | Xa |
| AlloMap                                                                                                             |                       |   |   |   |   |   |    |    |    | X  |                               | X |   |    |    | X  | X  |    | X  |    |          | Xc |
| Clinic visit                                                                                                        | X                     | X | X | X | X | X | X  | X  | X  | X  | X                             | X | X | X  | X  | X  | X  | X  | X  | X  | X        | Xb |
| Blood draw                                                                                                          | X                     | X | X | X | X | X | X  | X  | X  | X  |                               | X |   | X  |    | X  | X  |    | X  |    | X        | Xb |

| Suppl Table Ic-Center 3 post-heart transplant care-biopsy schedule and proposed blood draws for cell-free DNA assay |                       |   |   |   |   |    |    |                |    |    |                               |   |   |    |    |    |    |    |    |    |          |    |
|---------------------------------------------------------------------------------------------------------------------|-----------------------|---|---|---|---|----|----|----------------|----|----|-------------------------------|---|---|----|----|----|----|----|----|----|----------|----|
|                                                                                                                     | Weeks post-transplant |   |   |   |   |    |    |                |    |    | Months/years' post-transplant |   |   |    |    |    |    |    |    |    |          |    |
|                                                                                                                     | 1                     | 2 | 4 | 6 | 8 | 10 | 12 | 16             | 20 | 24 | 7                             | 8 | 9 | 10 | 11 | 12 | 15 | 18 | 21 | 24 | 2-5 yrs. |    |
| EMBx                                                                                                                | X                     | X | X | X | X | X  | X  | X              | X  | X  |                               | X |   | X  |    | X  |    | X  |    | X  | Xa       |    |
| AlloMap                                                                                                             |                       |   |   |   |   |    |    |                |    | X  |                               | X |   |    |    | X  | X  |    | X  |    |          |    |
| Clinic visit                                                                                                        | X                     | X | X | X | X | X  | X  | X <sub>1</sub> | X  | X  | X                             | X | X | X  | X  | X  | X  | X  | X  | X  | X        | Xb |
| Blood draw                                                                                                          | X                     | X | X | X | X | X  | X  | X <sub>1</sub> |    | X  |                               | X |   | X  |    | X  |    | X  |    | X  | Xb       |    |

| Suppl Table Id-Center 4 post-heart transplant care-biopsy schedule and proposed blood draws for cell-free DNA assay |                       |   |   |   |   |   |    |    |    |    |                               |   |   |    |    |    |    |    |    |    |          |    |
|---------------------------------------------------------------------------------------------------------------------|-----------------------|---|---|---|---|---|----|----|----|----|-------------------------------|---|---|----|----|----|----|----|----|----|----------|----|
|                                                                                                                     | Weeks post-transplant |   |   |   |   |   |    |    |    |    | Months/years' post-transplant |   |   |    |    |    |    |    |    |    |          |    |
|                                                                                                                     | 1                     | 2 | 3 | 4 | 6 | 8 | 12 | 16 | 20 | 24 | 7                             | 8 | 9 | 10 | 11 | 12 | 15 | 18 | 21 | 24 | 2-5 yrs. |    |
| EMBx                                                                                                                | X                     | X | X | X | X | X | X  | X  | X  | X  |                               |   |   |    | X  |    |    |    |    | X  | Xa       |    |
| AlloMap                                                                                                             |                       |   |   |   |   |   |    |    |    | X  | X                             | X | X | X  | X  |    | X  |    | X  |    |          |    |
| Clinic visit                                                                                                        | X                     | X | X | X | X | X | X  | X  | X  | X  | X                             | X | X | X  | X  | X  | X  | X  | X  | X  | X        | Xb |
| Blood draw                                                                                                          | X                     | X | X | X | X | X | X  | X  | X  | X  | X                             | X | X | X  | X  |    | X  |    | X  |    | X        | Xb |

| Suppl Table Ie-Center 5 post-heart transplant care-biopsy schedule and proposed blood draws for cell-free DNA assay |                       |  |  |  |  |  |  |  |  |  |                               |  |  |  |  |  |  |  |  |  |
|---------------------------------------------------------------------------------------------------------------------|-----------------------|--|--|--|--|--|--|--|--|--|-------------------------------|--|--|--|--|--|--|--|--|--|
|                                                                                                                     | Weeks post-transplant |  |  |  |  |  |  |  |  |  | Months/years' post-transplant |  |  |  |  |  |  |  |  |  |

|              | 1 | 2 | 3 | 4 | 6 | 10 | 14 | 16             | 20 | 24 | 7 | 8 | 9 | 10 | 11 | 12 | 15 | 18 | 21 | 24 | 2-5 yrs. |    |
|--------------|---|---|---|---|---|----|----|----------------|----|----|---|---|---|----|----|----|----|----|----|----|----------|----|
| EMBx         | X | X | X | X | X | X  | X  | X              |    | X  |   | X |   | X  |    | X  |    | X  |    | X  | Xa       |    |
| AlloMap      |   |   |   |   |   |    |    |                |    | X  |   | X |   |    |    | X  | X  |    | X  |    |          |    |
| Clinic visit | X | X | X | X | X | X  | X  | X <sub>1</sub> | X  | X  | X | X | X | X  | X  | X  | X  | X  | X  | X  | X        | Xb |
| Blood draw   | X | X | X | X | X | X  | X  | X <sub>1</sub> |    | X  |   | X |   | X  |    | X  |    | X  |    | X  |          | Xb |

EMBx = endomyocardial biopsy (scheduled), Xa = every 6 months, Xb = every 3 months. In addition to the pre-specified time-points, samples were also collected at clinically-indicated EMBx, which were performed when subjects present with clinical or echocardiographic signs of allograft dysfunction.

**Supplemental Table II: Induction and Maintenance Immunosuppression Regimen and Treatment for Acute Rejection**

**Supplemental Table IIa: Induction and maintenance immunosuppression regimen**

| Centers  | Induction                    |                                                                                                                                                                 | Maintenance                                                                                                                                  |
|----------|------------------------------|-----------------------------------------------------------------------------------------------------------------------------------------------------------------|----------------------------------------------------------------------------------------------------------------------------------------------|
|          | Initial steroid              | Other regimens                                                                                                                                                  |                                                                                                                                              |
| Center 1 | High dose methylprednisolone | Basiliximab/ATG* for all patients                                                                                                                               | FK/MMF/Pred, Prednisone is tapered by 1 year of transplantation unless there is concern for rejection                                        |
| Center 2 | High dose methylprednisolone | Basiliximab for Selected patients with PRA>25%, GFR<40                                                                                                          | FK/MMF/Pred, Prednisone is tapered by 6 months of transplantation unless there is concern for rejection                                      |
| Center 3 | High dose methylprednisolone | Basiliximab for selected patients with PRA (>25%), renal insufficiency/CKD (GFR < 40), age (<50), AA race, or inpatients                                        | FK/MMF/Pred, Prednisone is tapered by 6 months of transplantation unless there is concern for rejection                                      |
| Center 4 | High dose methylprednisolone | Basiliximab or ATG for selected patients with any of the following PRA (>25%), renal insufficiency/CKD (GFR < 40), age (<50), combined kidney/heart transplants | FK/MMF/Pred, Prednisone is tapered by 6 months of transplantation unless there is concern for rejection                                      |
| Center 5 | High dose methylprednisolone | ATG for selected patients with positive crossmatch, renal insufficiency/CKD (GFR < 40), combined kidney/heart transplants                                       | FK/MMF/Pred, Prednisone is tapered by 6 months of transplantation unless there is concern for rejection or underlying disease is sarcoidosis |

2015 – 2018 = Basiliximab, 2018 – present ATG, ATG = anti-thymocyte globulin, GFR = glomerular filtration rate, FK = FK-506, also called tacrolimus, MMF = mycophenolate mofetil, Pred = prednisone, PRA = AA = African American. Center 1 = Johns Hopkins Hospital, Center 2

= Medstar Washington Hospital Center, Center 3 = Inova Heart and Vascular Institute, Center 4 = Virginia Commonwealth University Hospital, Center 5 = University of Maryland Medical Center

**Supplemental Table IIb: Treatment for acute rejection by center**

| Centers  | Acute rejection                                                                                         |                                                 |
|----------|---------------------------------------------------------------------------------------------------------|-------------------------------------------------|
|          | ACR                                                                                                     | AMR                                             |
| Center 1 | IV steroids if hemodynamically unstable or if rejection occurs within 3months. Oral steroids for others | IV Steroids/Plex/Rituximab/IVIG                 |
| Center 2 | IV steroids. ATG with hemodynamic instability                                                           | IV steroids/Plex/IVIG/ Bortezomib               |
| Center 3 | Oral steroid or IV steroid + ATG with low EF or hemodynamic instability                                 | IV Steroid, Plex/IVIG/Thymo+Ritux or Bortezomib |
| Center 4 | Oral steroid or IV steroid + ATG with low EF or hemodynamic instability                                 | IV Steroid, Plex/IVIG/Ritux and/or Bortezomib   |
| Center 5 | Oral steroid or IV steroid + ATG with low EF or hemodynamic instability                                 | IV Steroid, Plex/IVIG.                          |

IV = intravenous, Plex = plasmapheresis, IVIG = Intravenous immunoglobulin, Thymo = thymoglobulin, Ritux = rituximab



### **Supplemental Table III: %ddcfDNA post-transplant kinetics**

---

#### **Supplemental Table IIIa: %ddcfDNA sequencing characteristics**

---

| <b>Parameters</b>                                              | <b>Average</b> | <b>Standard deviation</b> |
|----------------------------------------------------------------|----------------|---------------------------|
| Total reads/sample (million)                                   | 30.26          | 20.65                     |
| Reads after removing duplicates or low-quality reads (million) | 20.00          | 8.09                      |
| Reads with donor or recipient SNPs (thousand)                  | 14.96          | 9.29                      |
| Error rate (%)                                                 | 0.04           | 0.02                      |

---

---

#### **Supplemental Table IIIb: %ddcfDNA decay parameters**

---

| <b>Decay parameter</b> | <b>Measure</b> | <b>95% CI</b> |
|------------------------|----------------|---------------|
| Y0                     | 3.44           | 3.06 - 3.85   |
| Plateau                | 0.07           | 0.048 - 0.10  |
| K                      | 0.74           | 0.64 - 0.84   |
| Half Life              | 0.94           | 0.82 - 1.08   |
| Tau                    | 1.36           | 1.19- 1.56    |

---

**Supplemental Table IIIc: %ddcfDNA trend after transplantation**

| <b>Time after transplantation (Days)</b> | <b>Median %ddcfDNA</b> | <b>%ddcfDNA IQR (%)</b> |
|------------------------------------------|------------------------|-------------------------|
| 1                                        | 2.83                   | 1.68 – 4.02             |
| 7                                        | 0.19                   | 0.07 – 0.30             |
| 14                                       | 0.21                   | 0.11 – 0.40             |
| 28                                       | 0.13                   | 0.03 - 0.21             |
| 60                                       | 0.02                   | 0.01 - 0.13             |
| 90                                       | 0.01                   | 01 - 0.08               |
| 180                                      | 0.01                   | 0.01 - 0.04             |
| 270                                      | 0.03                   | 0.01 – 0.10             |
| 360                                      | 0.01                   | 0.01 – 0.08             |
| 450                                      | 0.01                   | 0.01 – 0.03             |
| 540                                      | 0.05                   | 0.01 – 0.14             |
| 630                                      | 0.05                   | 0.01 – 0.12             |
| 720                                      | 0.04                   | 0.01 – 0.14             |

**Supplemental Table IV: Changes in %ddcfDNA performance overtime post-transplantation**

**Supplemental Table IVa: %ddcfDNA test characteristics to detect biopsy-positive acute rejection: Eliminated biopsies before Day 7 after transplantation**

| %ddcfDNA threshold | Sensitivity (%) |      |     | Specificity (%) |      |     | AUROC<br>(95% CI)  |
|--------------------|-----------------|------|-----|-----------------|------|-----|--------------------|
|                    | 0.1             | 0.25 | 0.5 | 0.1             | 0.25 | 0.5 |                    |
| AR diagnosis       |                 |      |     |                 |      |     |                    |
| AR                 | 97              | 88   | 48  | 61              | 80   | 91  | 0.88 (0.85 – 0.91) |
| AMR                | 100             | 90   | 67  | 61              | 81   | 91  | 0.92 (0.88 – 0.95) |
| ACR                | 93              | 82   | 29  | 60              | 80   | 91  | 0.84 (0.79 – 0.89) |

**Supplemental Table IVb: %ddcfDNA test characteristics to detect biopsy-positive acute rejection - Eliminated biopsies before Day 14 after transplantation**

| %ddcfDNA threshold | Sensitivity (%) |      |     | Specificity (%) |      |     | AUROC<br>(95% CI)  |
|--------------------|-----------------|------|-----|-----------------|------|-----|--------------------|
|                    | 0.1             | 0.25 | 0.5 | 0.1             | 0.25 | 0.5 |                    |
| AR diagnosis       |                 |      |     |                 |      |     |                    |
| AR                 | 96              | 88   | 45  | 63              | 82   | 91  | 0.88 (0.85 – 0.92) |
| AMR                | 100             | 88   | 64  | 64              | 82   | 91  | 0.92 (0.88 – 0.95) |
| ACR                | 92              | 83   | 25  | 64              | 82   | 91  | 0.85 (0.80 – 0.90) |

**Supplemental Table IVc: %ddcfDNA test characteristics to detect biopsy-positive acute rejection - Eliminated biopsies before Day 45 after transplantation**

| %ddcfDNA threshold | Sensitivity (%) |      |     | Specificity (%) |      |     | AUROC<br>(95% CI)  |
|--------------------|-----------------|------|-----|-----------------|------|-----|--------------------|
|                    | 0.1             | 0.25 | 0.5 | 0.1             | 0.25 | 0.5 |                    |
| AR diagnosis       |                 |      |     |                 |      |     |                    |
| AR                 | 93              | 81   | 44  | 72              | 87   | 93  | 0.90 (0.85 – 0.94) |
| AMR                | 100             | 91   | 73  | 72              | 87   | 93  | 0.94 (0.90 – 0.99) |
| ACR                | 88              | 75   | 25  | 72              | 87   | 93  | 0.87 (0.81 – 0.93) |
